# Supplementary material for: The association between parental life history and offspring phenotype
Source: Oxford University Press journal article supplement (doi:10.1242/jeb.122531), 2015-01-01
Supplement: jeb122531supp.pdf [file jeb122531supp.pdf]

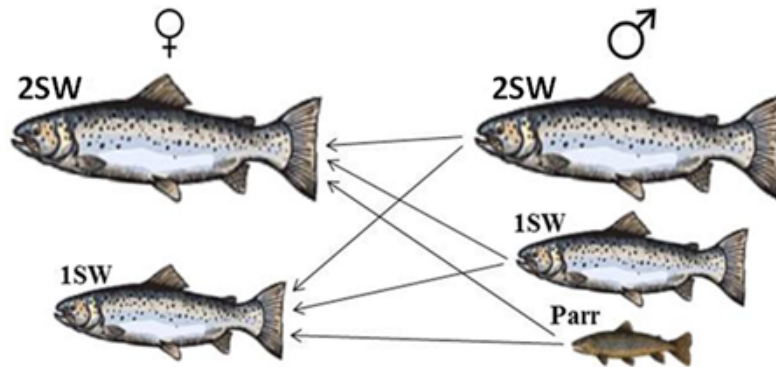

**Fig. S1.** A schematic diagram of each combination of life histories used in the factorial mating design adopted for the study. Note: 1SW= 1 year spent in sea water; 2SW= 2 years spent in sea water; Parr= males that matured in FW and spent 0 years in sea water; 1FW= 1 year spent in freshwater; 2 FW= 2 years spent in fresh water. See text for more details.

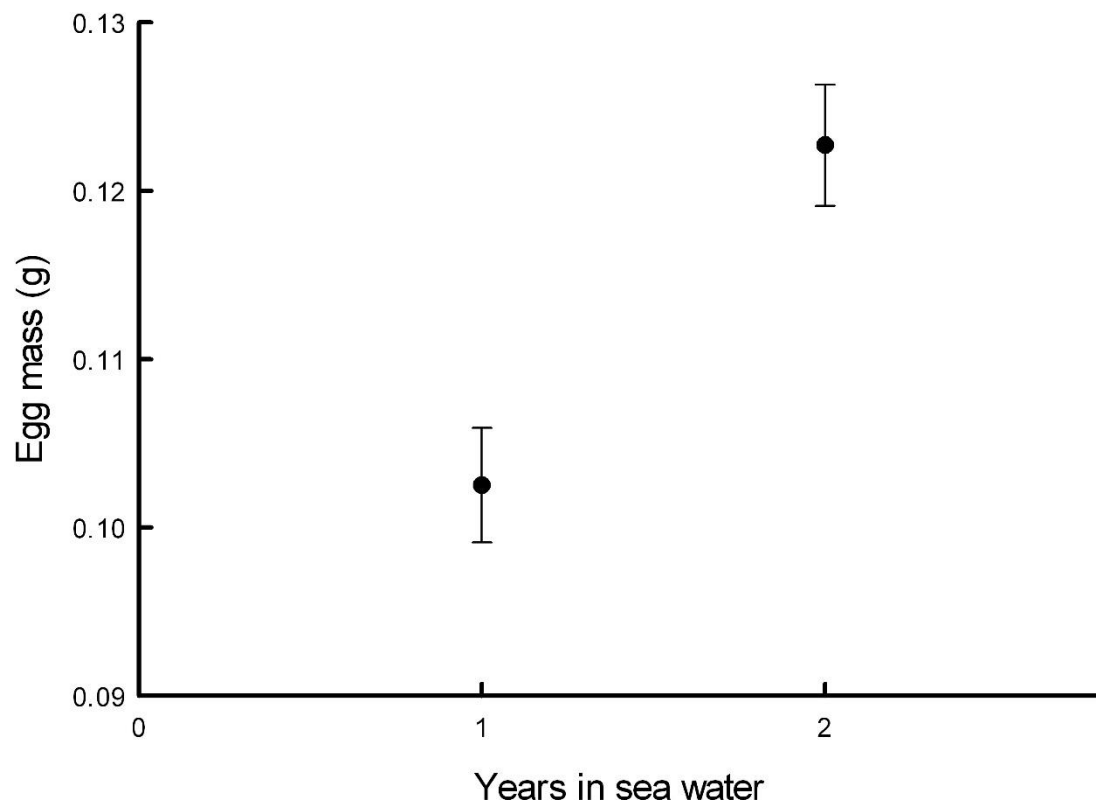

**Fig. S2.** The relationship between the time mothers had spent at sea (1 or 2 years) and egg mass. Error bars represent 95% confidence intervals. See text for statistical analysis.

**Table S1.** The sample size (number of pairs) for each combination of life histories used in the factorial mating design adopted for the study

| Parental type (Maternal: Paternal) | # of pairs |
|------------------------------------|------------|
| 1SW1SW                             | 8          |
| 1SW2SW                             | 7          |
| 1SWParr                            | 6          |
| 2SW1SW                             | 9          |
| 2SW2SW                             | 8          |
| 2SWParr                            | 7          |
| 2FW1FW                             | 2          |
| 2FW2FW                             | 5          |
| 2FW3FW                             | 5          |
| 3FW1FW                             | 5          |
| 3FW2FW                             | 19         |
| 3FW3FW                             | 9          |

Note: 1SW= 1 year spent in sea water; 2SW= 2 years spent in sea water; Parr= males that matured in FW and spent 0 years in sea water; 1FW= 1 year spent in freshwater; 2 FW= 2 years spent in fresh water. See text for more details.

**Table S2.** The sample size and average metabolic rate ( $\text{g}^{-1}$ ) for offspring from each combination of life histories used in the factorial mating design adopted for the study.

| Parental type (Maternal:Paternal) | Sample size (# of families) | SMR ( $\mu\text{mol/g/hr}$ ) $\pm$ SD | MMR( $\mu\text{mol/g/hr}$ ) $\pm$ SD | AS ( $\mu\text{mol/g/hr}$ ) $\pm$ SD |
|-----------------------------------|-----------------------------|---------------------------------------|--------------------------------------|--------------------------------------|
| 1SW1SW                            | 47 (8)                      | 7.71 $\pm$ 2.31                       | 25.25 $\pm$ 6.63                     | 17.54 $\pm$ 7.36                     |
| 1SW2SW                            | 59 (7)                      | 6.85 $\pm$ 2.65                       | 23.64 $\pm$ 6.64                     | 16.8 $\pm$ 7.49                      |
| 1SWParr                           | 56 (6)                      | 7.58 $\pm$ 2.15                       | 25.23 $\pm$ 5.87                     | 17.65 $\pm$ 6.32                     |
| 2SW1SW                            | 95 (9)                      | 7.17 $\pm$ 2.24                       | 25.84 $\pm$ 6.07                     | 18.67 $\pm$ 5.93                     |
| 2SW2SW                            | 67 (8)                      | 7.90 $\pm$ 2.27                       | 24.50 $\pm$ 5.95                     | 16.60 $\pm$ 6.05                     |
| 2SWParr                           | 67 (7)                      | 7.57 $\pm$ 2.66                       | 25.14 $\pm$ 6.84                     | 17.57 $\pm$ 7.38                     |
| 2FW1FW                            | 10 (2)                      | 6.49 $\pm$ 2.50                       | 28.14 $\pm$ 9.46                     | 21.65 $\pm$ 10.48                    |
| 2FW2FW                            | 43 (5)                      | 7.56 $\pm$ 2.01                       | 26.35 $\pm$ 6.06                     | 18.79 $\pm$ 6.11                     |
| 2FW3FW                            | 47 (5)                      | 7.27 $\pm$ 2.18                       | 25.63 $\pm$ 6.43                     | 18.36 $\pm$ 6.64                     |
| 3FW1FW                            | 49 (5)                      | 7.51 $\pm$ 2.22                       | 24.21 $\pm$ 5.10                     | 16.70 $\pm$ 5.49                     |
| 3FW2FW                            | 170 (19)                    | 7.44 $\pm$ 2.73                       | 23.69 $\pm$ 5.91                     | 16.39 $\pm$ 6.16                     |
| 3FW3FW                            | 73 (9)                      | 7.53 $\pm$ 1.97                       | 26.61 $\pm$ 7.52                     | 19.07 $\pm$ 7.78                     |

Note: SMR= standard metabolic rate; MMR= maximal metabolic rate; AS= aerobic scope; 1SW= 1 year spent in sea water; 2SW= 2 years spent in sea water; Parr= males that matured in FW and spent 0 years in sea water; 1FW= 1 year spent in freshwater; 2 FW= 2 years spent in fresh water. See text for more details.

**Table S3.**

[Click here to Download Table S3](#)
